# Supplementary material for: Functional CDKN2A assay identifies frequent deleterious alleles misclassified as variants of uncertain significance
Source: eLife. 2022 Jan 10;11:e71137. doi: 10.7554/eLife.71137 (PMC8824478; doi:10.7554/eLife.71137)
Supplement: Figure 2—source data 4. [file elife-71137-fig2-data4.xlsx]

## Sheet: B
PANC1	Day0	Day1	Day3	Day5	Day7	Day9	Day12	Day14
Replicate	0.0446429	0.0357143	0.0875	0.186161	0.233929	0.513393	0.71875	1.04018
Replicate	0.0446429	0.043125	0.105804	0.186607	0.226786	0.700893	0.767857	1.00893
Replicate	0.0446429	0.046875	0.113393	0.191964	0.311607	0.438393	0.861607	0.901786
AVERAGE	0.0446429	0.0419048	0.102232	0.188244	0.25744	0.550893	0.782738	0.983631
S.D	0	0.00567954	0.0133108	0.00322954	0.0470455	0.135208	0.0725818	0.0725818
Empty Vector	Day0	Day1	Day3	Day5	Day7	Day9	Day12	Day14
Replicate	0.0446429	0.041875	0.08125	0.184821	0.249107	0.522321	0.767857	0.986607
Replicate	0.0446429	0.0504464	0.104911	0.191071	0.300446	0.571429	0.75	1.07589
Replicate	0.0446429	0.0553571	0.142857	0.227679	0.324107	0.46875	0.848214	0.9375
AVERAGE	0.0446429	0.0492262	0.109673	0.20119	0.29122	0.520833	0.78869	1
S.D	0	0.0068234	0.0310784	0.0231512	0.0383418	0.0513555	0.0523167	0.0701618
CDKN2A-p.Leu78Hisfs*41	Day0	Day1	Day3	Day5	Day7	Day9	Day12	Day14
Replicate	0.0446429	0.0369643	0.075	0.252679	0.25625	0.46875	0.620536	0.776786
Replicate	0.0446429	0.046875	0.113393	0.238839	0.311607	0.477679	0.705357	0.9375
Replicate	0.0446429	0.0553571	0.120536	0.205804	0.289732	0.535714	0.625	1.13393
AVERAGE	0.0446429	0.0463988	0.102976	0.23244	0.285863	0.494048	0.650298	0.949405
S.D	0	0.00920567	0.0244899	0.0240837	0.0278806	0.0363595	0.0477352	0.178869
CDKN2A-p.Val126Asp	Day0	Day1	Day3	Day5	Day7	Day9	Day12	Day14
Replicate	0.0446429	0.0406696	0.139732	0.209375	0.212946	0.35625	0.580357	0.901786
Replicate	0.0446429	0.044375	0.142857	0.186161	0.272321	0.299554	0.558036	0.696429
Replicate	0.0446429	0.046875	0.104911	0.142857	0.221875	0.308036	0.669643	0.821429
AVERAGE	0.0446429	0.0439732	0.129167	0.179464	0.235714	0.32128	0.602679	0.806548
S.D	0	0.00312213	0.0210643	0.0337607	0.0320155	0.0305806	0.0590569	0.103484
CDKN2A-p.Gly101Trp	Day0	Day1	Day3	Day5	Day7	Day9	Day12	Day14
Replicate	0.0446429	0.0406696	0.155357	0.213839	0.212946	0.319196	0.522321	0.785714
Replicate	0.0446429	0.041875	0.138393	0.183482	0.199554	0.301786	0.486607	0.741071
Replicate	0.0446429	0.0553571	0.0848214	0.209375	0.214732	0.309375	0.53125	0.901786
AVERAGE	0.0446429	0.0459673	0.12619	0.202232	0.209077	0.310119	0.513393	0.809524
S.D	0	0.00815418	0.0368171	0.0163907	0.00829605	0.00872917	0.0236228	0.0829605
CDKN2A-WT	Day0	Day1	Day3	Day5	Day7	Day9	Day12	Day14
Replicate	0.0446429	0.0406696	0.0602679	0.0691964	0.0897321	0.138839	0.210714	0.225
Replicate	0.0446429	0.046875	0.120536	0.0839286	0.09375	0.161607	0.190179	0.264732
Replicate	0.0446429	0.0504464	0.0517857	0.0392857	0.112054	0.161607	0.209375	0.228125
AVERAGE	0.0446429	0.045997	0.0775298	0.0641369	0.0985119	0.154018	0.203423	0.239286
S.D	0	0.00494717	0.0374849	0.0227474	0.0118982	0.013145	0.0114892	0.0220926
