# Supplementary material for: Functional CDKN2A assay identifies frequent deleterious alleles misclassified as variants of uncertain significance
Source: eLife. 2022 Jan 10;11:e71137. doi: 10.7554/eLife.71137 (PMC8824478; doi:10.7554/eLife.71137)
Supplement: Figure 3—figure supplement 2—source data 1. [file elife-71137-fig3-figsupp2-data1.xlsx]

## Sheet: Sheet1
MIA PaCa-2							AsPC-1
Variant	Replicate	Replicate	Replicate	Average	Ratio		Variant	Replicate	Replicate	Replicate	Average	Ratio
M9T	6.02	4.53	4.44	4.99667	0.379494		M9T	7.81	7.31	7.04	7.38667	0.629545
P11L	3.95	3.89	3.73	3.85667	0.292911		P11L	8.06	6.71	3.89	6.22	0.530114
L16R	14.3	12.8	12.1	13.0667	0.992405		L16R	13.5	13	12	12.8333	1.09375
T18P	13.2	10.7	10.2	11.3667	0.863291		T18P	15.4	13	11.1	13.1667	1.12216
A20G	9.52	9.47	9.27	9.42	0.715443		A20G	10.3	9.52	9.49	9.77	0.83267
R24Q	4.61	4.31	4.11	4.34333	0.329873		R24Q	8.69	7.23	5.85	7.25667	0.618466
R24P	10.5	10.2	9.63	10.11	0.767848		R24P	11.2	10.9	9.03	10.3767	0.884375
P41Q	3.45	3.34	3.09	3.29333	0.250127		P41Q	8.45	7.51	6.46	7.47333	0.636932
I49T	10.7	10.6	10.2	10.5	0.797468		I49T	12.6	12.2	10.1	11.6333	0.991477
Q50R	14.3	13.5	13.1	13.6333	1.03544		Q50R	10.7	9.11	8.67	9.49333	0.809091
M53I	11.6	11.3	11.1	11.3333	0.860759		M53I	12.8	12.5	11.6	12.3	1.0483
A57V	2.98	2.95	2.65	2.86	0.217215		A57V	2.98	2.46	2.26	2.56667	0.21875
L65P	11.2	10.5	9.52	10.4067	0.79038		L65P	14.7	12	10.8	12.5	1.06534
H66P	9.22	8.92	8.78	8.97333	0.681519		H66P	11.3	11	10.5	10.9333	0.931818
H66R	3.53	2.84	2.62	2.99667	0.227595		H66R	5.22	4.14	5.63	4.99667	0.425852
G67R	5.88	5.13	4.64	5.21667	0.396203		G67R	5.71	6.4	5.11	5.74	0.489205
A68V	11.8	10.9	10.2	10.9667	0.832911		A68V	8.94	9.57	10.2	9.57	0.815625
E69G	4.83	4.61	4.39	4.61	0.350127		E69G	3.92	4.06	4.58	4.18667	0.356818
D74A	11.6	10.8	8.69	10.3633	0.787089		D74A	11.3	9.77	8.49	9.85333	0.839773
D74H	6.87	6.29	4.89	6.01667	0.456962		D74H	8.11	7.07	6.57	7.25	0.617898
Leu78Hisfs*41	14	11.3	10.6	11.9667	0.908861		Leu78Hisfs*41	13.4	12.7	12.1	12.7333	1.08523
H83Y	14.4	12.3	11.8	12.8333	0.974684		H83Y	11.8	11.4	9.06	10.7533	0.916477
D84A	13.9	13.8	12.5	13.4	1.01772		D84A	12.6	11.5	10.3	11.4667	0.977273
D84N	12	11.9	10.4	11.4333	0.868354		D84N	14.8	15.1	12.4	14.1	1.2017
G89D	12.8	12.6	10.2	11.8667	0.901266		G89D	9.69	9.66	9.52	9.62333	0.82017
R99G	4.99	4.66	4.66	4.77	0.362278		R99G	4.42	3.15	4.69	4.08667	0.348295
A100S	5.02	4.91	4.69	4.87333	0.370127		A100S	7.2	6.49	7.2	6.96333	0.593466
G101R	5.27	5.16	3.26	4.56333	0.346582		G101R	4.53	7.65	8.25	6.81	0.580398
G101W	13.8	12.7	12.4	12.9667	0.98481		G101W	11.6	10.7	10	10.7667	0.917614
A109P	14.9	12.8	12.2	13.3	1.01013		A109P	13.8	13.5	13.2	13.5	1.15057
G111S	3.97	3.92	3.84	3.91	0.296962		G111S	4	3.92	3.15	3.69	0.314489
G122V	6.62	6.24	6.07	6.31	0.479241		G122V	8.14	7.12	6.87	7.37667	0.628693
H123Q	3.34	3.15	2.65	3.04667	0.231392		H123Q	3.64	3.28	3.2	3.37333	0.2875
R124C	3.75	3.59	3.17	3.50333	0.266076		R124C	6.21	7.84	5.33	6.46	0.550568
D125H	6.62	6.18	5.41	6.07	0.461013		D125H	3.53	4.77	7.84	5.38	0.458523
V126D	14.3	12.8	11.7	12.9333	0.982278		V126D	11.9	11.3	10.8	11.3333	0.965909
A127S	3.12	2.9	2.44	2.82	0.214177		A127S	3.2	2.51	2.04	2.58333	0.22017
A127P	12.3	11.1	10.3	11.2333	0.853165		A127P	10.8	9.58	8.47	9.61667	0.819602
R128P	10.9	10.5	9.22	10.2067	0.77519		R128P	10.6	11.2	10.7	10.8333	0.923295
A134T	4.94	4.86	3.93	4.57667	0.347595		A134T	3.53	2.87	3.58	3.32667	0.283523
G139R	3.78	3.39	2.73	3.3	0.250633		G139R	4.31	4.77	3.73	4.27	0.36392
A143T	2.82	2.18	2.01	2.33667	0.177468		A143T	3.53	4.14	3.81	3.82667	0.326136
R144C	3.64	3.59	3.48	3.57	0.271139		R144C	5.99	2.48	2.43	3.63333	0.309659
A148T	4.42	3.86	3.39	3.89	0.295443		A148T	4.66	4.25	4.16	4.35667	0.371307
CDKN2A-WT	4.44	3.17	2.79	3.46667	0.263291		CDKN2A-WT	2.68	2.57	2.54	2.59667	0.221307
Empty vector	13.7	13.2	12.6	13.1667	1		Empty vector	12	12.6	10.6	11.7333	1
