# Supplementary material for: Functional CDKN2A assay identifies frequent deleterious alleles misclassified as variants of uncertain significance
Source: eLife. 2022 Jan 10;11:e71137. doi: 10.7554/eLife.71137 (PMC8824478; doi:10.7554/eLife.71137)
Supplement: Figure 3—figure supplement 3—source data 1. [file elife-71137-fig3-figsupp3-data1.xlsx]

## Sheet: Sheet1
Variant	Ratio
M9T	0.408527
P11L	0.386014
L16R	0.989928
T18P	0.958534
A20G	0.790659
R24Q	0.394045
R24P	0.846406
P41Q	0.411918
I49T	0.875987
Q50R	0.939971
M53I	0.933981
A57V	0.287718
L65P	0.880569
H66P	0.873006
H66R	0.34499
G67R	0.342133
A68V	0.850157
E69G	0.283137
D74A	0.88972
D74H	0.560868
Leu78Hisfs*41	0.981124
H83Y	0.975224
D84A	0.970975
D84N	1.0082
G89D	0.84668
R99G	0.301708
A100S	0.387029
G101R	0.452161
G101W	0.915146
A109P	0.992328
G111S	0.390054
G122V	0.563335
H123Q	0.333879
R124C	0.357863
D125H	0.366557
V126D	0.936012
A127S	0.204898
A127P	0.926206
R128P	0.855303
A134T	0.303526
G139R	0.249359
A143T	0.310475
R144C	0.248945
A148T	0.269739
CDKN2A-WT	0.230346
Empty vector	1
