# Supplementary material for: Functional CDKN2A assay identifies frequent deleterious alleles misclassified as variants of uncertain significance
Source: eLife. 2022 Jan 10;11:e71137. doi: 10.7554/eLife.71137 (PMC8824478; doi:10.7554/eLife.71137)
Supplement: Figure 3—source data 1. [file elife-71137-fig3-data1.xlsx]

## Sheet: Sheet1
MIA PaCa-2
Variant	Replicate	Replicate	Replicate	Average	Ratio
M9T	6.02	4.53	4.44	4.99667	0.379494
P11L	3.95	3.89	3.73	3.85667	0.292911
L16R	14.3	12.8	12.1	13.0667	0.992405
T18P	13.2	10.7	10.2	11.3667	0.863291
A20G	9.52	9.47	9.27	9.42	0.715443
R24Q	4.61	4.31	4.11	4.34333	0.329873
R24P	10.5	10.2	9.63	10.11	0.767848
P41Q	3.45	3.34	3.09	3.29333	0.250127
I49T	10.7	10.6	10.2	10.5	0.797468
Q50R	14.3	13.5	13.1	13.6333	1.03544
M53I	11.6	11.3	11.1	11.3333	0.860759
A57V	2.98	2.95	2.65	2.86	0.217215
L65P	11.2	10.5	9.52	10.4067	0.79038
H66P	9.22	8.92	8.78	8.97333	0.681519
H66R	3.53	2.84	2.62	2.99667	0.227595
G67R	5.88	5.13	4.64	5.21667	0.396203
A68V	11.8	10.9	10.2	10.9667	0.832911
E69G	4.83	4.61	4.39	4.61	0.350127
D74A	11.6	10.8	8.69	10.3633	0.787089
D74H	6.87	6.29	4.89	6.01667	0.456962
Leu78Hisfs*41	14	11.3	10.6	11.9667	0.908861
H83Y	14.4	12.3	11.8	12.8333	0.974684
D84A	13.9	13.8	12.5	13.4	1.01772
D84N	12	11.9	10.4	11.4333	0.868354
G89D	12.8	12.6	10.2	11.8667	0.901266
R99G	4.99	4.66	4.66	4.77	0.362278
A100S	5.02	4.91	4.69	4.87333	0.370127
G101R	5.27	5.16	3.26	4.56333	0.346582
G101W	13.8	12.7	12.4	12.9667	0.98481
A109P	14.9	12.8	12.2	13.3	1.01013
G111S	3.97	3.92	3.84	3.91	0.296962
G122V	6.62	6.24	6.07	6.31	0.479241
H123Q	3.34	3.15	2.65	3.04667	0.231392
R124C	3.75	3.59	3.17	3.50333	0.266076
D125H	6.62	6.18	5.41	6.07	0.461013
V126D	14.3	12.8	11.7	12.9333	0.982278
A127S	3.12	2.9	2.44	2.82	0.214177
A127P	12.3	11.1	10.3	11.2333	0.853165
R128P	10.9	10.5	9.22	10.2067	0.77519
A134T	4.94	4.86	3.93	4.57667	0.347595
G139R	3.78	3.39	2.73	3.3	0.250633
A143T	2.82	2.18	2.01	2.33667	0.177468
R144C	3.64	3.59	3.48	3.57	0.271139
A148T	4.42	3.86	3.39	3.89	0.295443
CDKN2A-WT	4.44	3.17	2.79	3.46667	0.263291
Empty vector	13.7	13.2	12.6	13.1667	1
