# Supplementary material for: Functional CDKN2A assay identifies frequent deleterious alleles misclassified as variants of uncertain significance
Source: eLife. 2022 Jan 10;11:e71137. doi: 10.7554/eLife.71137 (PMC8824478; doi:10.7554/eLife.71137)
Supplement: Figure 4—source data 1. [file elife-71137-fig4-data1.xlsx]

## Sheet: Sheet1
Variant	G1 (%)	G2/M (%)	S (%)
M9T	59.5	27.5	11.8
P11L	63.9	22.3	12.8
L16R	47.4	49.2	12.2
T18P	51.3	37.9	9.61
A20G	50.9	38.9	8.57
R24Q	59.3	36.6	3.87
R24P	43	44.8	10.8
P41Q	68.8	18.9	11.4
I49T	48.2	44.2	6.94
Q50R	47.6	41.3	10.2
M53I	50.9	40.5	7.93
A57V	58.4	35.1	6.13
L65P	42.7	44.6	11.5
H66P	49.6	37.3	11.9
H66R	57.6	34.6	7.33
G67R	60.7	31	7.29
A68V	50.6	40.9	7.79
E69G	66.8	23.1	8.64
D74A	52.3	38.4	7.84
D74H	62.4	29.5	7.31
Leu78Hisfs*41	47.5	37.7	13.1
H83Y	44.7	43.6	11
D84A	49.1	37.6	12
D84N	46.4	41.9	10.4
G89D	46	39.6	13.8
R99G	59.9	26.3	12.5
A100S	66.9	20.1	11.7
G101R	59	28.6	10.8
G101W	46.6	39.2	13.3
A109P	48.6	42.7	7.55
G111S	63.9	27.9	7.64
G122V	58.3	28	12
H123Q	63	24.4	11.7
R124C	68.6	23.3	7.35
D125H	66.5	20.9	11.4
V126D	50.3	40.2	9.13
A127S	59.2	26.9	11.9
A127P	42.2	45.5	11.1
R128P	50.6	40.3	8.52
A134T	59.1	28.1	11
G139R	66.1	23.7	9.01
A143T	66.8	21.1	10.6
R144C	66.7	23.1	9.13
A148T	60.6	30.8	7.68
CDKN2A-WT	67.1	19.3	12.3
Empty vector	46.8	44.3	7.66
