# Supplementary material for: Functional CDKN2A assay identifies frequent deleterious alleles misclassified as variants of uncertain significance
Source: eLife. 2022 Jan 10;11:e71137. doi: 10.7554/eLife.71137 (PMC8824478; doi:10.7554/eLife.71137)
Supplement: Supplementary file 1. [file elife-71137-supp1.xlsx]

## Sheet: Supp. Table 1
	Table 1. CDKN2A variants assayed with genomic, transcript, and protein change
	Variant			Classificationa
	Genome	Transript	Protein
	NC_000009.12:g.21970916C>T	NM_000077.5:c.442G>A	NP_000068.1:p.Ala148Thr	Benign
	NC_000009.12:g.21971060C>A	NM_000077.5:c.298G>T	NP_000068.1:p.Ala100Ser	Likely benign
	NC_000009.12:g.21970979C>A	NM_000077.5:c.379G>T	NP_000068.1:p.Ala127Ser	Likely benign
	NC_000009.12:g.21971188G>A	NM_000077.5:c.170C>T	NP_000068.1:p.Ala57Val	Likely benign
	NC_000009.12:g.21970989A>T	NM_000077.5:c.369T>A	NP_000068.1:p.His123Gln	Likely benign
	NC_000009.12:g.21970929G>A	NM_000077.5:c.430C>T	NP_000068.1:p.Arg144Cys	Likely benign
	NC_000009.12:g.21971108C>T	NM_000077.5:c.250G>A	NP_000068.1:p.Asp84Asn	Likely pathogenic
	NC_000009.12:g.21971111G>A	NM_000077.5:c.247C>T	NP_000068.1:p.His83Tyr	Likely pathogenic
	NC_000009.12:g.21974681A>G	NM_000077.5:c.146T>C	NP_000068.1:p.Ile49Thr	Likely pathogenic
	NC_000009.12:g.21971127_21971128del	NM_000077.5:c.230_231del	NP_000068.1:p.Leu78Hisfs*41	Likely pathogenic
	NC_000009.12:g.21971057C>A	NM_000077.5:c.301G>T	NP_000068.1:p.Gly101Trp	Pathogenic
	NC_000009.12:g.21974780A>C	NM_000077.5:c.47T>G	NP_000068.1:p.Leu16Arg	Pathogenic
	NC_000009.12:g.21971199C>T	NM_000077.5:c.159G>A	NP_000068.1:p.Met53Ile	Pathogenic
	NC_000009.12:g.21974756C>G	NM_000077.5:c.71G>C	NP_000068.1:p.Arg24Pro	Pathogenic
	NC_000009.12:g.21970981A>T	NM_000077.5:c.377T>A	NP_000068.1:p.Val126Asp	Pathogenic
	NC_000009.12:g.21971033C>G	NM_000077.5:c.325G>C	NP_000068.1:p.Ala109Pro	VUS
	NC_000009.12:g.21970979C>G	NM_000077.5:c.379G>C	NP_000068.1:p.Ala127Pro	VUS
	NC_000009.12:g.21970958C>T	NM_000077.5:c.400G>A	NP_000068.1:p.Ala134Thr	VUS
	NC_000009.12:g.21970931C>T	NM_000077.5:c.427G>A	NP_000068.1:p.Ala143Thr	VUS
	NC_000009.12:g.21974768G>C	NM_000077.5:c.59C>G	NP_000068.1:p.Ala20Gly	VUS
	NC_000009.12:g.21971155G>A	NM_000077.5:c.203C>T	NP_000068.1:p.Ala68Val	VUS
	NC_000009.12:g.21970985C>G	NM_000077.5:c.373G>C	NP_000068.1:p.Asp125His	VUS
	NC_000009.12:g.21971137T>G	NM_000077.5:c.221A>C	NP_000068.1:p.Asp74Ala	VUS
	NC_000009.12:g.21971138C>G	NM_000077.5:c.220G>C	NP_000068.1:p.Asp74His	VUS
	NC_000009.12:g.21971107T>G	NM_000077.5:c.251A>C	NP_000068.1:p.Asp84Ala	VUS
	NC_000009.12:g.21971152T>C	NM_000077.5:c.206A>G	NP_000068.1:p.Glu69Gly	VUS
	NC_000009.12:g.21971057C>T	NM_000077.5:c.301G>A	NP_000068.1:p.Gly101Arg	VUS
	NC_000009.12:g.21971027C>T	NM_000077.5:c.331G>A	NP_000068.1:p.Gly111Ser	VUS
	NC_000009.12:g.21970993C>A	NM_000077.5:c.365G>T	NP_000068.1:p.Gly122Val	VUS
	NC_000009.12:g.21970943C>G	NM_000077.5:c.415G>C	NP_000068.1:p.Gly139Arg	VUS
	NC_000009.12:g.21971159C>G	NM_000077.5:c.199G>C	NP_000068.1:p.Gly67Arg	VUS
	NC_000009.12:g.21971092C>T	NM_000077.5:c.266G>A	NP_000068.1:p.Gly89Asp	VUS
	NC_000009.12:g.21971161T>G	NM_000077.5:c.197A>C	NP_000068.1:p.His66Pro	VUS
	NC_000009.12:g.21971161T>C	NM_000077.5:c.197A>G	NP_000068.1:p.His66Arg	VUS
	NC_000009.12:g.21971164A>G	NM_000077.5:c.194T>C	NP_000068.1:p.Leu65Pro	VUS
	NC_000009.12:g.21974801A>G	NM_000077.5:c.26T>C	NP_000068.1:p.Met9Thr	VUS
	NC_000009.12:g.21974795G>A	NM_000077.5:c.32C>T	NP_000068.1:p.Pro11Leu	VUS
	NC_000009.12:g.21974705G>T	NM_000077.5:c.122C>A	NP_000068.1:p.Pro41Gln	VUS
	NC_000009.12:g.21974678T>C	NM_000077.5:c.149A>G	NP_000068.1:p.Gln50Arg	VUS
	NC_000009.12:g.21970988G>A	NM_000077.5:c.370C>T	NP_000068.1:p.Arg124Cys	VUS
	NC_000009.12:g.21970975C>G	NM_000077.5:c.383G>C	NP_000068.1:p.Arg128Pro	VUS
	NC_000009.12:g.21974756C>T	NM_000077.5:c.71G>A	NP_000068.1:p.Arg24Gln	VUS
	NC_000009.12:g.21971063G>C	NM_000077.5:c.295C>G	NP_000068.1:p.Arg99Gly	VUS
	NC_000009.12:g.21974775T>G	NM_000077.5:c.52A>C	NP_000068.1:p.Thr18Pro	VUS
	aClassification using ACMG variant classification guidelines.
