# Supplementary material for: Functional CDKN2A assay identifies frequent deleterious alleles misclassified as variants of uncertain significance
Source: eLife. 2022 Jan 10;11:e71137. doi: 10.7554/eLife.71137 (PMC8824478; doi:10.7554/eLife.71137)
Supplement: Supplementary file 2. [file elife-71137-supp2.xlsx]

## Sheet: Supp. Table 2
	Table 2. Functional characterization
	Variant	PANC-1	MIA PaCa-2	AsPC-1	Mean value of three cell lines
	p.Met9Thr	Neutral	Neutral	Potentially neutral	Neutral
	p.Pro11Leu	Neutral	Neutral	Potentially neutral	Neutral
	p.Thr18Pro	Deleterious	Deleterious	Deleterious	Deleterious
	p.Ala20Gly	Deleterious	Potentially deleterious	Potentially deleterious	Potentially deleterious
	p.Arg24Gln	Neutral	Neutral	Potentially neutral	Neutral
	p.Pro41Gln	Neutral	Neutral	Potentially neutral	Neutral
	p.Gln50Arg	Deleterious	Deleterious	Potentially deleterious	Deleterious
	p.Leu65Pro	Potentially deleterious	Potentially deleterious	Deleterious	Deleterious
	p.His66Pro	Deleterious	Potentially deleterious	Deleterious	Deleterious
	p.His66Arg	Neutral	Neutral	Neutral	Neutral
	p.Gly67Arg	Neutral	Neutral	Neutral	Neutral
	p.Ala68Val	Deleterious	Deleterious	Potentially deleterious	Deleterious
	p.Glu69Gly	Neutral	Neutral	Neutral	Neutral
	p.Asp74Ala	Deleterious	Potentially deleterious	Potentially deleterious	Deleterious
	p.Asp74His	Potentially neutral	Potentially neutral	Potentially neutral	Potentially neutral
	p.Asp84Ala	Deleterious	Deleterious	Deleterious	Deleterious
	p.Gly89Asp	Deleterious	Deleterious	Potentially deleterious	Deleterious
	p.Arg99Gly	Neutral	Neutral	Neutral	Neutral
	p.Gly101Arg	Neutral	Neutral	Potentially neutral	Neutral
	p.Ala109Pro	Deleterious	Deleterious	Deleterious	Deleterious
	p.Gly111Ser	Potentially neutral	Neutral	Neutral	Neutral
	p.Gly122Val	Potentially neutral	Potentially neutral	Potentially neutral	Potentially neutral
	p.Arg124Cys	Neutral	Neutral	Potentially neutral	Neutral
	p.Asp125His	Neutral	Neutral	Neutral	Neutral
	p.Ala127Pro	Deleterious	Deleterious	Potentially deleterious	Deleterious
	p.Arg128Pro	Deleterious	Potentially deleterious	Deleterious	Deleterious
	p.Ala134Thr	Neutral	Neutral	Neutral	Neutral
	p.Gly139Arg	Neutral	Neutral	Neutral	Neutral
	p.Ala143Thr	Neutral	Neutral	Neutral	Neutral
