# Supplementary material for: Functional CDKN2A assay identifies frequent deleterious alleles misclassified as variants of uncertain significance
Source: eLife. 2022 Jan 10;11:e71137. doi: 10.7554/eLife.71137 (PMC8824478; doi:10.7554/eLife.71137)
Supplement: Supplementary file 3. [file elife-71137-supp3.xlsx]

## Sheet: Supp. Table 3
	Table 3. Previously reported functional data for assayed CDKN2A variants
	Variant	CDK4 binding	CDK6	Cell proliferation	Cell viability	Cell cycle arrest	Reference (PMID)
	NP_000068.1:p.Met9Thr	-	-	-	-	-	-
	NP_000068.1:p.Pro11Leu	-	-	-	-	-	-
	NP_000068.1:p.Ler16Arg	Loss	Loss	-	-	Loss of arrest	33823155
	NP_000068.1:p.Thr18Pro	-	-	-	-	-	-
	NP_000068.1:p.Ala20Gly	-	-	-	-	-	-
	NP_000068.1:p.Arg24Pro	Loss	Same as WT			Loss of arrest	20340136
	NP_000068.1:p.Arg24Gln	Same as WT	-	Same as WT	-		23190892, 19260062
	NP_000068.1:p.Pro41Gln	-	-	-	-	-	-
	NP_000068.1:p.Ile49Thr	Same as WT	Same as WT	Loss of inhibition		Loss of arrest	21462282, 10389768
	NP_000068.1:p.Gln50Arg	-	-	-	-	-	-
	NP_000068.1:p.Met53Ile	Loss	Same as WT	Loss of inhibition	-	-	10389768
	NP_000068.1:p.Ala57Val	Same as WT	-	Same as WT	-	-	19260062
	NP_000068.1:p.Leu65Pro	-	-	-	-	-	-
	NP_000068.1:p.His66Pro	-	-	-	-	-	-
	NP_000068.1:p.His66Arg	-	-	-	-	-	-
	NP_000068.1:p.Gly67Arg	Partially loss	-	-	-	-	19260062
	NP_000068.1:p.Ala68Val	-	-	-	-	-	-
	NP_000068.1:p.Glu69Gly	Partially loss					19260062
	NP_000068.1:p.Asp74Ala	-	-	-	-	-	-
	NP_000068.1:p.Asp74His	-	-	-	-	-	-
	NP_000068.1:p.Leu78Hisfs*41	-	-	-	Loss of inhibition	-	29533785
	NP_000068.1:p.His83Tyr	Loss	Loss	Loss of inhibition		Loss of arrest	10491434, 9324288
	NP_000068.1:p.Asp84Ala	-	-	-	-	-	-
	NP_000068.1:p.Asp84Asn	Loss	Loss	-	-	-	21462282, 10498896
	NP_000068.1:p.Gly89Asp	-	-	-	-	-	-
	NP_000068.1:p.Arg99Gly	-	-	-	-	-	-
	NP_000068.1:p.Ala100Ser	-	-	-	Same as WT	Same as WT	29533785
	NP_000068.1:p.Gly101Arg	-	-	-	-	Same as WT	21462282
	NP_000068.1:p.Gly101Trp	Loss	Loss	Loss of inhibition	-	-	21462282, 20340136, 10389768, 9324288, 8668202
	NP_000068.1:p.Ala109Pro	-	-	-	-	-	-
	NP_000068.1:p.Gly111Ser	-	-	-	-	-	-
	NP_000068.1:p.Gly122Val	Loss	Same as WT	Partially loss of inhibition	-	-	10951521
	NP_000068.1:p.His123Gln	-	-	-	Same as WT	-	29533785
	NP_000068.1:p.Arg124Cys	-	-	-	-	-	-
	NP_000068.1:p.Asp125His	-	-	-	-	-	-
	NP_000068.1:p.Val126Asp	Loss	Loss	Loss of inhibition	-	-	20340136, 10389768, 8668202
	NP_000068.1:p.Ala127Pro	-	-	-	-	-	-
	NP_000068.1:p.Ala127Ser	Same as WT	Same as WT	Same as WT	-	-	21462282, 10498896
	NP_000068.1:p.Arg128Pro	-	-	-	-	-	-
	NP_000068.1:p.Ala134Thr	-	-	-	-	-	-
	NP_000068.1:p.Gly139Arg	-	-	-	-	-	-
	NP_000068.1:p.Ala143Thr	-	-	-	-	-	-
	NP_000068.1:p.Arg144Cys	Same as WT	Same as WT	Same as WT	-	Same as WT	21462282, 20340136, 10491434, 9324288, 7780957
	NP_000068.1:p.Ala148Thr	Same as WT	Same as WT	Same as WT	-	-	21462282, 20340136, 10389768, 8668202
