# Supplementary material for: Functional CDKN2A assay identifies frequent deleterious alleles misclassified as variants of uncertain significance
Source: eLife. 2022 Jan 10;11:e71137. doi: 10.7554/eLife.71137 (PMC8824478; doi:10.7554/eLife.71137)
Supplement: Supplementary file 4. [file elife-71137-supp4.xlsx]

## Sheet: Supp. Table 4
	Table 4. Primer sequences used for subconing and site directed mutagenesis
	Variant	Primer
	SubcloneWT_F	GTTGGCGAATTCGCCACCATGGAG
	SubcloneWT_R	AGTTGGGGAATTCTCAATCG
	p.Met9Thr_F	GGGAGCAGCACGGAGCCTTCG
	p.Met9Thr_R	CGCCGCCGGCTCCATTCA
	p.Pro11Leu_F	AGCATGGAGCTTTCGGCTGACTGGCTGG
	p.Pro11Leu_R	GCTCCCCGCCGCCGGCTC
	p.Leu16Arg_F	GCTGACTGGCGGGCCACGGCC
	p.Leu16Arg_R	CGAAGGCTCCATGCTGCTCCC
	p.Thr18Pro_F	CTGGCTGGCCCCGGCCGCGGCCC
	p.Thr18Pro_R	TCAGCCGAAGGCTCCATGCTGCTCCCC
	p.Ala20Gly_F	GCCACGGCCGGGGCCCGGGGT
	p.Ala20Gly_R	CAGCCAGTCAGCCGAAGGCTCCATGCTGC
	p.Arg24Pro_F	GCCCGGGGTCCGGTAGAGGAGGTGCG
	p.Arg24Pro_R	CGCGGCCGTGGCCAGCCA
	p.Arg24Gln_F	GCCCGGGGTCAGGTAGAGGAGGTGC
	p.Arg24Gln_R	CGCGGCCGTGGCCAGCCA
	p.Pro41Gln_F	CCCAACGCACAGAATAGTTACGGTCGGAGG
	p.Pro41Gln_R	CAGCGCCCCCGCCTCCAG
	p.Ile49Thr_F	CGGAGGCCGACCCAGGTCATG
	p.Ile49Thr_R	ACCGTAACTATTCGGTGCGTTG
	p.Gln50Arg_F	GAGGCCGATCCGGGTCATGATGA
	p.Gln50Arg_R	CGACCGTAACTATTCGGTGC
	p.Met53Ile_F	AGGTCATGATAATGGGCAGCGCC
	p.Met53Ile_R	GGATCGGCCTCCGACCGT
	p.Ala57Val_F	ATGGGCAGCGTCCGAGTGGCG
	p.Ala57Val_R	CATCATGACCTGGATCGGCCTCCG
	p.Leu65Pro_F	GCTGCTGCTGCCCCACGGCGCGG
	p.Leu65Pro_R	TCCGCCACTCGGGCGCTG
	p.His66Pro_F	CTGCTGCTCCCCGGCGCGGAG
	p.His66Pro_R	CAGCTCCGCCACTCGGGC
	p.His66Arg_F	CTGCTGCTCCGCGGCGCGGAG
	p.His66Arg_R	CAGCTCCGCCACTCGGGC
	p.Gly67Arg_F	GCTGCTCCACCGCGCGGAGCC
	p.Gly67Arg_R	AGCAGCTCCGCCACTCGG
	p.Ala68Val_F	CTCCACGGCGTGGAGCCCAAC
	p.Ala68Val_R	CAGCAGCAGCTCCGCCAC
	p.Glu69Gly_F	CACGGCGCGGGGCCCAACTGC
	p.Glu69Gly_R	GAGCAGCAGCAGCTCCGCC
	p.Asp74Ala_F	AACTGCGCCGCCCCCGCCACTC
	p.Asp74Ala_R	GGGCTCCGCGCCGTGGAG
	p.Asp74His_F	CAACTGCGCCCACCCCGCCAC
	p.Asp74His_R	GGCTCCGCGCCGTGGAGC
	p.His83Tyr_F	CCGACCCGTGTACGACGCTGC
	p.His83Tyr_R	GTGAGAGTGGCGGGGTCG
	p.Asp84Ala_F	ACCCGTGCACGCCGCTGCCCGGG
	p.Asp84Ala_R	CGGGTGAGAGTGGCGGGGTCG
	p.Asp84Asn_F	ACCCGTGCACAACGCTGCCCG
	p.Asp84Asn_R	CGGGTGAGAGTGGCGGGG
	p.Gly89Asp_F	GCCCGGGAGGACTTCCTGGAC
	p.Gly89Asp_R	AGCGTCGTGCACGGGTCG
	p.Arg99Gly_F	GGTGCTGCACGGGGCCGGGGC
	p.Arg99Gly_R	ACCAGCGTGTCCAGGAAGCCC
	p.Ala100Ser_F	GCTGCACCGGTCCGGGGCGCG
	p.Ala100Ser_R	ACCACCAGCGTGTCCAGGAAGCCC
	p.Gly101Arg_F	GCACCGGGCCCGTGCGCGGCTGG
	p.Gly101Arg_R	AGCACCACCAGCGTGTCCAGGAAGCC
	p.Gly101Trp_F	GCACCGGGCCTGGGCGCGGCTGG
	p.Gly101Trp_R	AGCACCACCAGCGTGTCCAGGAAGCC
	p.Ala109Pro_F	CGTGCGCGATCCCTGGGGCCGTC
	p.Ala109Pro_R	TCCAGCCGCGCCCCGGCC
	p.Gly111Ser_F	CGATGCCTGGAGCCGTCTGCCC
	p.Gly111Ser_R	CGCACGTCCAGCCGCGCC
	p.Gly122Val_F	GAGGAGCTGGTCCATCGCGATGTC
	p.Gly122Val_R	AGCCAGGTCCACGGGCAG
	p.His123Gln_F	AGCTGGGCCAACGCGATGTCG
	p.His123Gln_R	CCTCAGCCAGGTCCACGG
	p.Arg124Cys_F	GCTGGGCCATTGCGATGTCGC
	p.Arg124Cys_R	TCCTCAGCCAGGTCCACG
	p.Asp125His_F	GGGCCATCGCCATGTCGCACG
	p.Asp125His_R	AGCTCCTCAGCCAGGTCC
	p.Val126Asp_F	CCATCGCGATGACGCACGGTACC
	p.Val126Asp_R	CCCAGCTCCTCAGCCAGG
	p.Ala127Pro_F	TCGCGATGTCCCACGGTACCTGC
	p.Ala127Pro_R	TGGCCCAGCTCCTCAGCC
	p.Ala127Ser_F	TCGCGATGTCTCACGGTACCTGC
	p.Ala127Ser_R	TGGCCCAGCTCCTCAGCC
	p.Arg128Pro_F	GATGTCGCACCGTACCTGCGCG
	p.Arg128Pro_R	GCGATGGCCCAGCTCCTC
	p.Ala134Thr_F	GCGCGCGGCTACGGGGGGCAC
	p.Ala134Thr_R	AGGTACCGTGCGACATCGCGATGGC
	p.Gly139Arg_F	GGGCACCAGACGCAGTAACCATGCCCGCATAGATGC
	p.Gly139Arg_R	CCCGCAGCCGCGCGCAGG
	p.Ala143Thr_F	CAGTAACCATACCCGCATAGATGCCGC
	p.Ala143Thr_R	CCTCTGGTGCCCCCCGCA
	p.Arg144Cys_F	TAACCATGCCtGCATAGATGCCGC
	p.Arg144Cys_R	CTGCCTCTGGTGCCCCCC
	p.Ala148Thr_F	CATAGATGCCACGGAAGGTCCC
	p.Ala148Thr_R	CGGGCATGGTTACTGCCT
