# Supplementary figures and images for: Functional CDKN2A assay identifies frequent deleterious alleles misclassified as variants of uncertain significance
Source: eLife journal article supplement (doi:10.7554/elife.71137), 2022-01-10

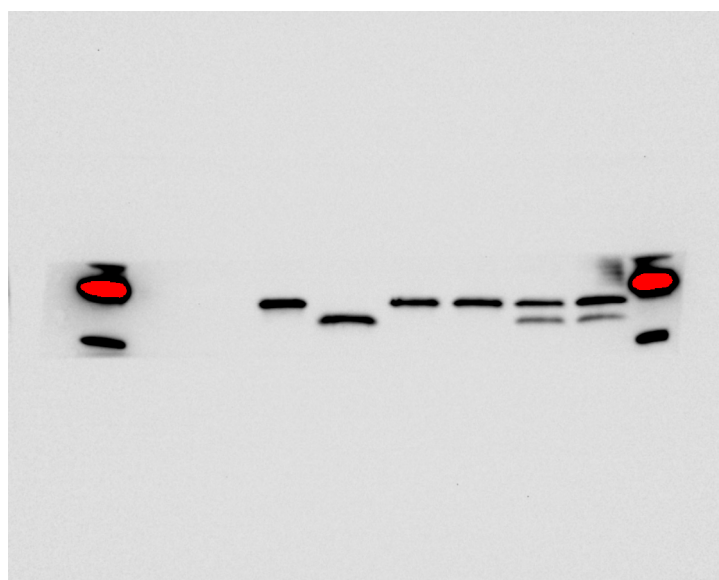

Supplement: fig2-data1 [file elife-71137-fig2-data1-v2.zip]

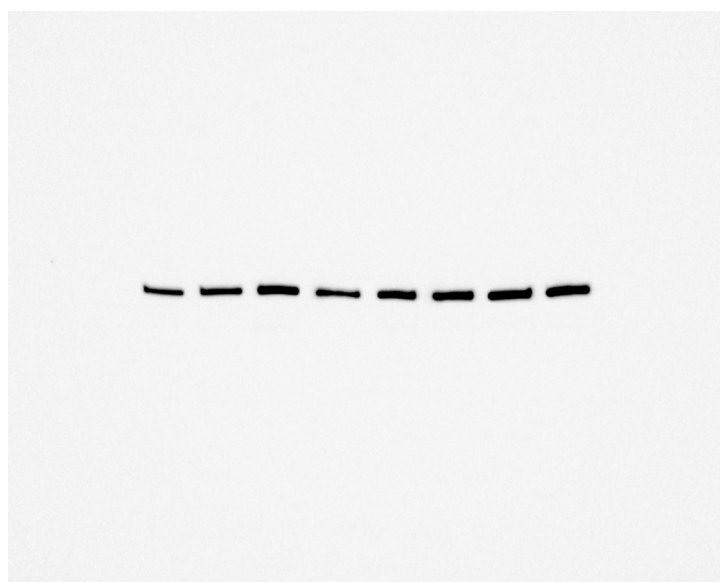

Supplement: fig2-data2 [file Figure 2source data 2.pdf › Figure 2source data 2.pdf]

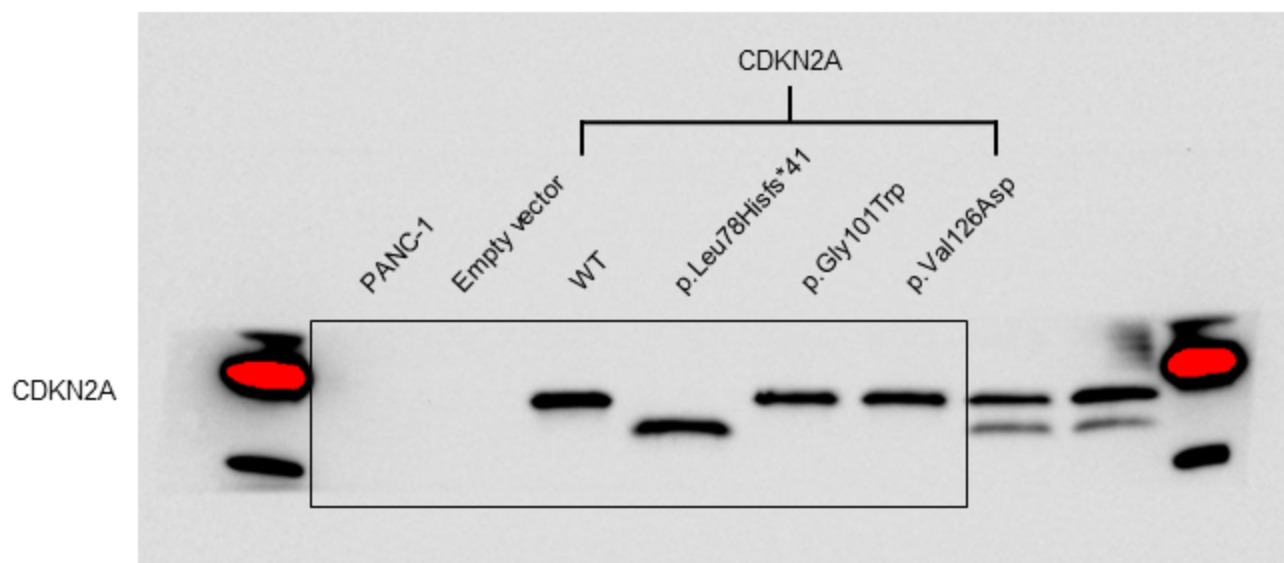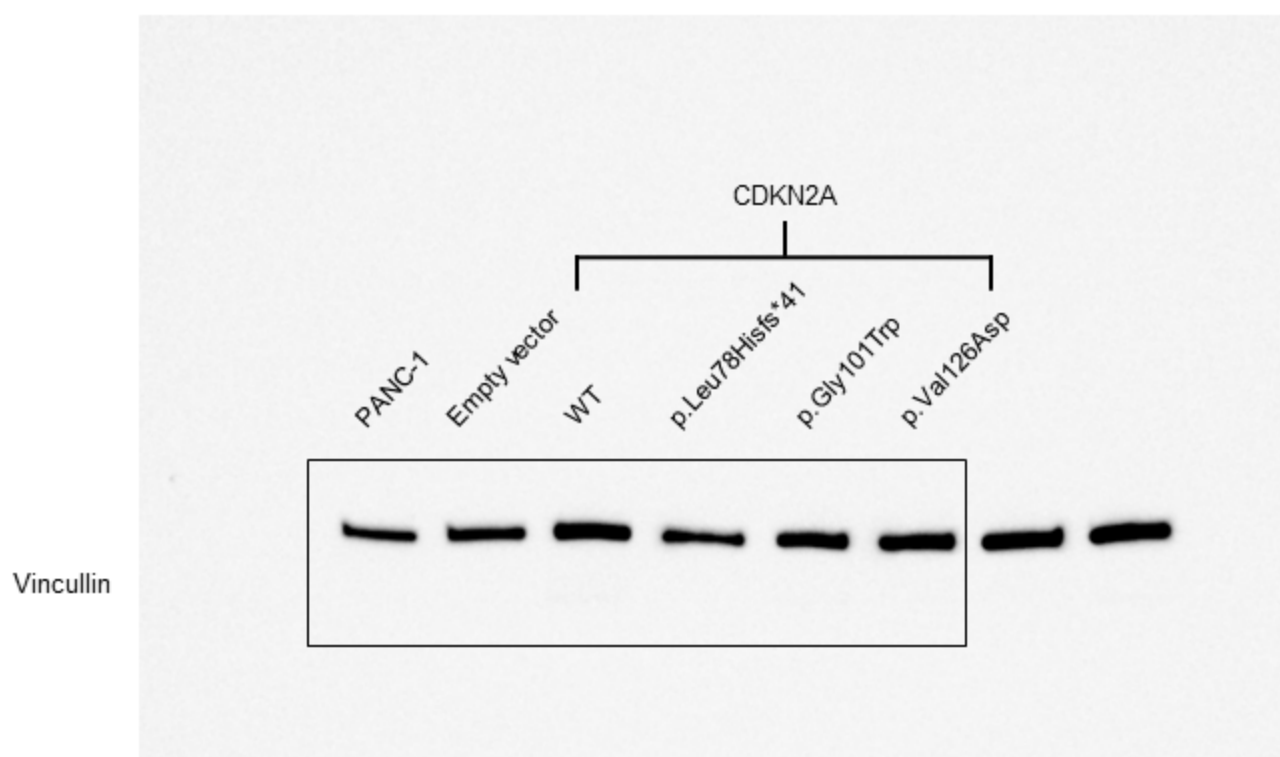

Supplement: fig2-data3 [file elife-71137-fig2-data3-v2.zip]

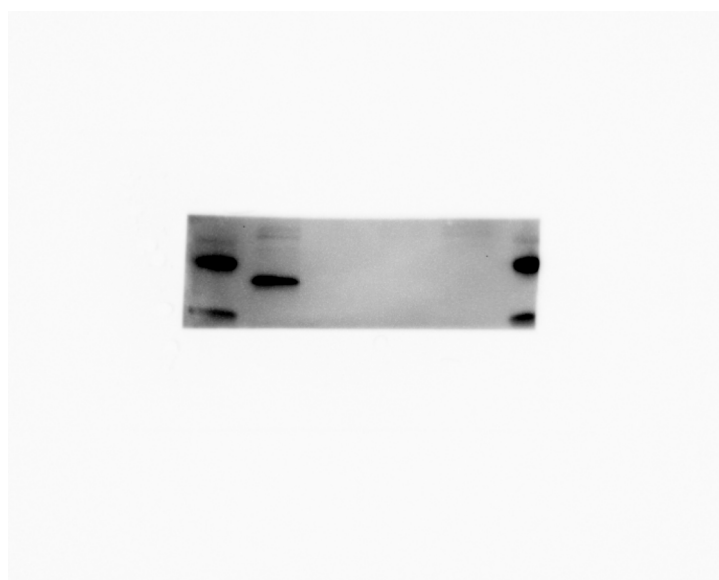

Supplement: fig3-figsupp1-data1 [file elife-71137-fig3-figsupp1-data1-v2.zip]

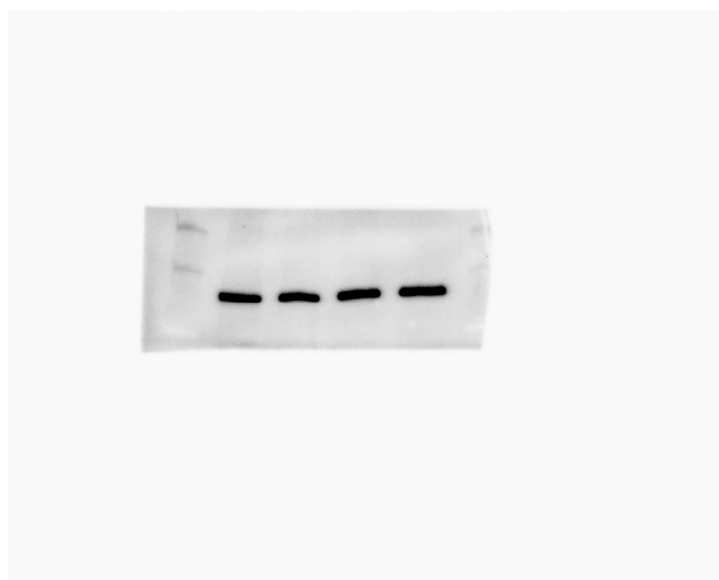

Supplement: fig3-figsupp1-data2 [file Figure 3figure supplement 1source data 2.pdf › Figure 3figure supplement 1source data 2.pdf]

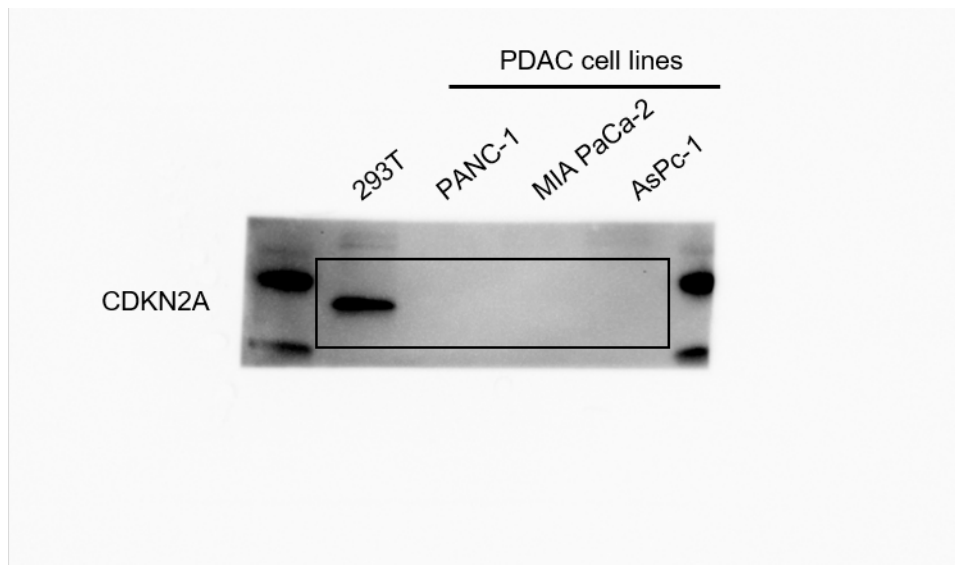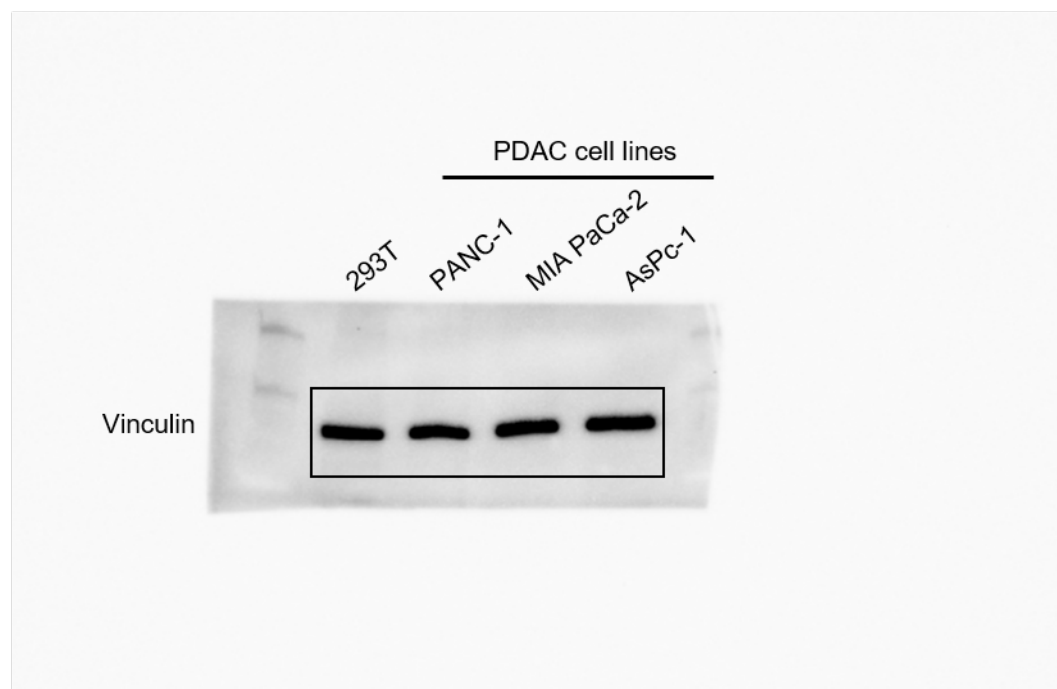

Supplement: fig3-figsupp1-data3 [file elife-71137-fig3-figsupp1-data3-v2.zip]
